# Supplementary material for: Iron oxalate capped iron–copper nanomaterial for oxidative transformation of aldehydes
Source: Royal Society of Chemistry journal article supplement (doi:10.1039/c4nj01966k), 2014-12-01
Supplement: c4nj01966k1.pdf [file c4nj01966k1.pdf]

## **Iron Oxalate Capped Iron-copper Nano for oxidative transformation of aldehydes**

*Rajarshi Kashyap, Dhruba Joyti Talukdar, and Sanjay Pratihar\**

[spratihar@tezu.ernet.in](mailto:spratihar@tezu.ernet.in), [spratihar29@gmail.com](mailto:spratihar29@gmail.com)

*†Department of Chemical Sciences, Tezpur University, Napaam, 784028, Assam, India*

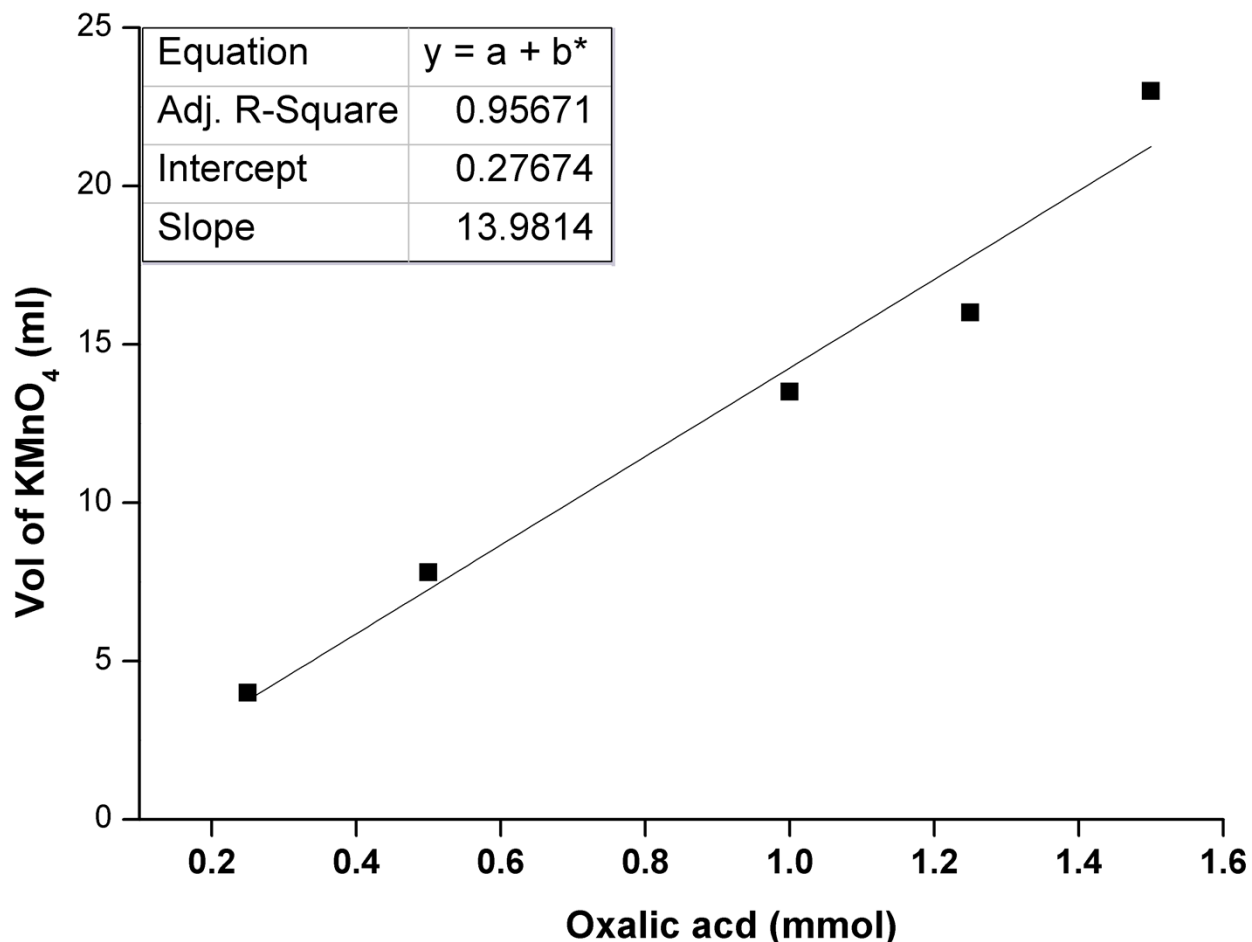

**Fig. S1** Calibration curve of permanganate ( $\text{KMnO}_4$ ) titration of oxalic acid in water at  $50^\circ\text{C}$ .

**Typical procedure for  $\text{KMnO}_4$  titration of excess oxalic acid during the synthesis of  $\text{Fe}(\text{ox})\text{Fe}-\text{Cu}(\text{Ox})$ :**

First of all potassium permanganate solution has been standardized against a sample of potassium oxalate. After determination of exact normality of the permanganate solution, it was used as a standard oxidizing solution for the determination of variable amount of oxalic acid. In a typical procedure, 284 mg of Mohr's salt,  $(\text{NH}_4)_2\text{SO}_4 \cdot \text{FeSO}_4$  was taken in 150 ml of distilled water in a 500 ml conical flask and 126 mg of oxalic acid,  $\text{H}_2\text{C}_2\text{O}_4$  was added to this and stirred vigorously. In another 500 ml conical flask, a solution of 1.2 g of sodium borohydride,  $\text{NaBH}_4$  was prepared in 100 ml distilled water and was added slowly in an earlier prepared solution with vigorous stirring. During the addition, the color of the solution slowly changed into yellow. After few minutes, when black Fe nano particle began to appear, the  $\text{NaBH}_4$  addition was stopped. To this, earlier prepared 100 ml 0.01(M)

CuSO<sub>4</sub> solution was slowly added to it at 60 °C for 0.5 h. After 5-6 h of addition, the color of the solution slowly turned to yellowish brown. After 16 h, the solid sample was collected by centrifugation. The excess amount of oxalic acid in the reaction solution was titrated with standard KMnO<sub>4</sub> solution at 60 °C.

**Typical procedure for sample preparation for ICP-OES analysis:**

In a fume hood, 500 mg of the appropriate nanomaterial was taken in a 100 ml conical flask and 15 mL of concentrated HCl was added to it and covered with a watch glass and heated nearly to boiling in the hood with occasional stirring. Additional HCl was added to only if evaporation reduces the volume significantly; that is, nanomaterial is re-precipitated. Following dissolution, solution was gently boil for a few minutes to expel as much HCl(g) as possible. Finally, distilled water was added to it for makeup of 1000 ml volume. The ICP-OES measurement was done with this solution.

| Hit | REV | for | Compound Name                                                            |    |
|-----|-----|-----|--------------------------------------------------------------------------|----|
| 1   | 941 | 827 | .BETA.-1,5-O-DIBENZOYL-RIBOFURANOSE                                      |    |
| 2   | 914 | 902 | METHANOL, OXO-, BENZOATE                                                 |    |
| 3   | 903 | 893 | BENZENECARBOXYLIC ACID                                                   |    |
| 4   | 897 | 851 | CYCLOBUTANE-1,1-DICARBOXAMIDE, N,N'-DI-BENZOYLOXY-                       |    |
| 5   | 888 | 839 | 2-CHLOROETHYL BENZOATE                                                   | 11 |
| 6   | 886 | 848 | HEPTANEDIAMIDE, N,N'-DI-BENZOYLOXY-                                      | 39 |
| 7   | 874 | 822 | (+)-DIBENZOYL-L-TARTARIC ACID ANHYDRIDE                                  | 34 |
| 8   | 856 | 819 | BENZOIC ACID 2-BROMOETHYL ESTER                                          | 22 |
| 9   | 852 | 797 | (D)-(+)-(2R,3R)-2,3-DIBENZOYL TARTARIC ACID                              | 35 |
| 10  | 841 | 781 | 2,5-CYCLOHEXADIENE-1,4-DIONE, BIS(O-BENZOYLOXIME)                        | 34 |
| 11  | 836 | 806 | CYCLOPROPANECARBOXAMIDE, N-BENZOYLOXY-                                   | 20 |
| 12  | 834 | 767 | 3(1H)-IMINO-2-(2,3,5-TRIS-O-BENZOYL-BETA-D-RIBOFURANOSYL)-2,3-DIHYDRO-S- | 56 |
| 13  | 818 | 555 | 3-BENZOYL-5-(2,4-DICHLOROBENZYLIDENE)RHODANINE                           | 39 |
| 14  | 815 | 784 | 1,2,4-TRIOXOLANE, 3,5-DIPHENYL-                                          | 22 |
| 15  | 814 | 729 | SALICYLIDENE BENZHYDRAZIDE                                               | 24 |
| 16  | 814 | 713 | 1-O-MONOACETYL-2,3-O-DIBENZOYL-D-RIBOFURANOSE                            | 40 |
| 17  | 798 | 752 | BENZENE-1,4-DICARBOXAMIDE, N,N'-BIS(BENZOYLOXY)-                         | 40 |
| 18  | 797 | 764 | 4-PIPERIDINEPROPANOIC ACID, 1-BENZOYL-3-(2-CHLOROETHYL)-, ETHYL ESTER    | 35 |
| 19  | 795 | 757 | BENZOIC ACID, ETHYL ESTER                                                | 15 |
| 20  | 788 | 761 | 2,3-DIBENZOYL-MESO-TARTARIC ANHYDRIDE                                    | 34 |

, 27-Dec-2013 + 10:42:30

R1 859 (7.295)

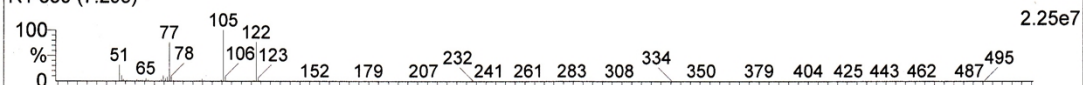

R:903 Nist 61614: BENZENECARBOXYLIC ACID

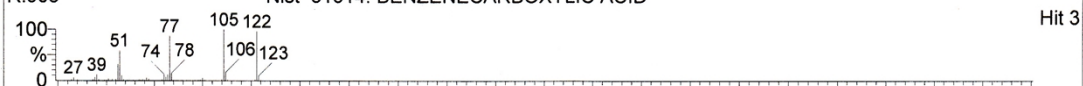

R:897 Nist 60259: CYCLOBUTANE-1,1-DICARBOXAMIDE, N,N'-DI-BENZOYLOXY-

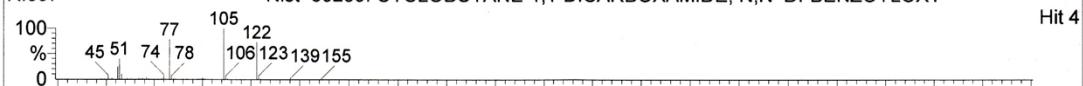

R:888 Nist 61613: 2-CHLOROETHYL BENZOATE

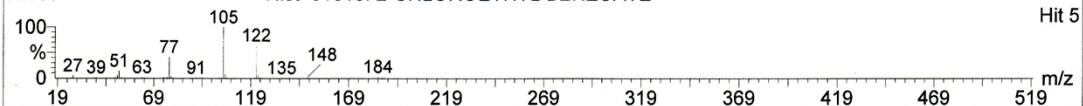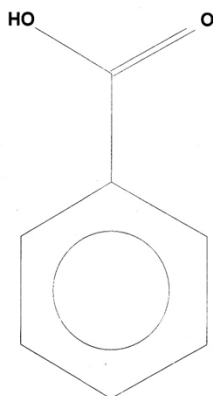

| Hit | REV | for | Compound Name                                                 | M.V |
|-----|-----|-----|---------------------------------------------------------------|-----|
| 1   | 945 | 935 | BENZOIC ACID, METHYL ESTER                                    | 136 |
| 2   | 939 | 920 | BENZOIC ACID, HYDRAZIDE                                       | 136 |
| 3   | 928 | 752 | PHENYLGLYOXAL                                                 | 134 |
| 4   | 919 | 755 | VINYL BENZOATE                                                | 148 |
| 5   | 917 | 775 | N-METHOXY-N-METHYLBENZAMIDE                                   | 168 |
| 6   | 912 | 758 | ACETOPHENONE, 2-CHLORO-                                       | 154 |
| 7   | 911 | 741 | BENZOYL BROMIDE                                               | 184 |
| 8   | 909 | 741 | PHENACYLIDENE DIACETATE                                       | 236 |
| 9   | 908 | 759 | PHENACYL THIOCYANATE                                          | 177 |
| 10  | 905 | 740 | BENZENEPROPANENITRILE, .BETA.-OXO-                            | 148 |
| 11  | 899 | 868 | ETHANONE, 2-HYDROXY-1-PHENYL-                                 | 136 |
| 12  | 897 | 722 | ETHANEDIONE, DIPHENYL-                                        | 210 |
| 13  | 895 | 701 | BENZHYDRAZIDE, N2-(2,3-DIHYDRO-3-BENZOYL-2-BENZOTHAZOLYLENE)- | 378 |
| 14  | 892 | 669 | BENZAMIDE, 4-BENZOYL-N-(IMMINO)(METHYLTHIO)METHYL-            | 298 |
| 15  | 886 | 726 | 2-(2-OXO-2-PHENYL-ETHYL)-MALONONITRILE                        | 184 |
| 16  | 883 | 713 | BENZOYL CHLORIDE                                              | 146 |
| 17  | 881 | 710 | BENZENEACETIC ACID, .ALPHA.-OXO-, ETHYL ESTER                 | 178 |
| 18  | 879 | 736 | ETHANONE, 2-BROMO-1-PHENYL-                                   | 198 |
| 19  | 878 | 713 | ETHANONE, 2,2,2-TRIFLUORO-1-PHENYL-                           | 174 |
| 20  | 876 | 712 | .ALPHA.,.ALPHA.-DICHLOROACETOPHENONE                          | 188 |

, 27-Dec-2013 + 10:42:30

R1 690 (6.450)

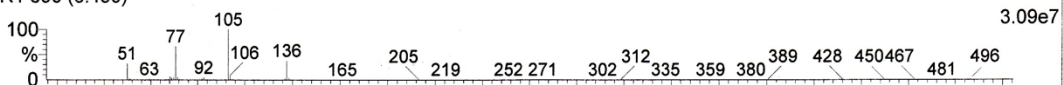

R:945 Nist 60353: BENZOIC ACID, METHYL ESTER

Hit 1

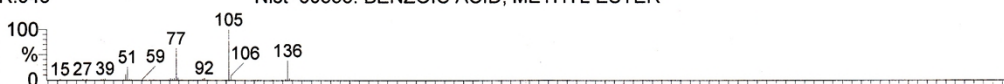

R:939 Nist 60351: BENZOIC ACID, HYDRAZIDE

Hit 2

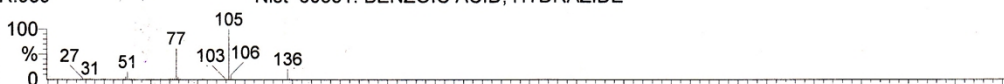

R:928 Nist 59869: PHENYLGLYOXAL

Hit 3

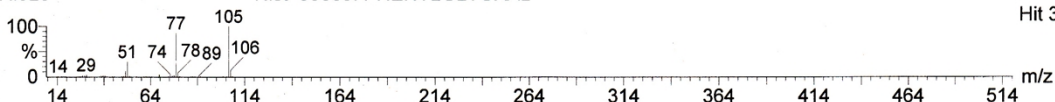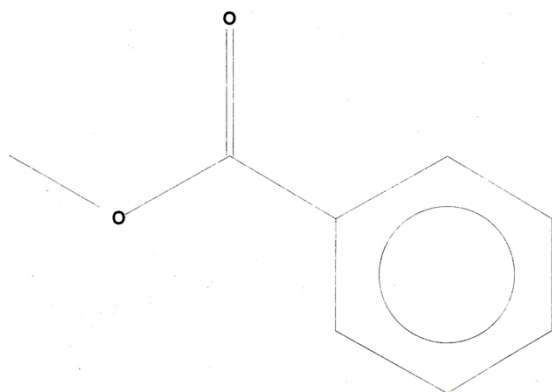

, 26-Dec-2013 + 13:02:3

Scan EI  
TI  
8.26e

Ald 3

100

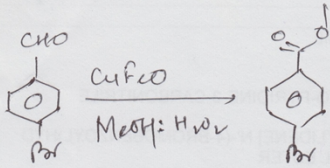

8.45;182

4-bromo methyl ester (benzoic a)  
(100%)

%

8.33  
182

0 3.00 5.00 7.00 9.00 11.00 13.00 15.00 Time

S pratihar2

| Hit | REV | for | Compound Name                                                       | M.V |
|-----|-----|-----|---------------------------------------------------------------------|-----|
| 7   | 581 | 447 | BENZALDEHYDE, P-BROMO-, O-METHYLOXIME                               | 213 |
| 8   | 557 | 395 | BENZENE, 1-BROMO-2-ETHENYL-                                         | 182 |
| 9   | 556 | 392 | BENZENE, 1-BROMO-4-ETHENYL-                                         | 182 |
| 10  | 552 | 404 | 5-CHLORO-4,6-DIMETHYL-2-OXO-1,2-DIHYDRO-PYRIDINE-3-CARBONITRILE     | 182 |
| 11  | 536 | 342 | 3-BROMOSTYRENE                                                      | 182 |
| 12  | 536 | 327 | N-[2-(2-PROPENYLOXY)-3,5-DIBROMOBENZYLIDENE] N'-(4-BROMOBENZOYL)HYD | 514 |
| 13  | 533 | 350 | BENZOIC ACID, 2-CHLORO-6-NITRO-, METHYL ESTER                       | 215 |
| 14  | 524 | 348 | 2H-BENZ[E]1,3-OXAZIN-4(3H)-ONE, 6-CHLORO-2-TRICHLOROMETHYL-         | 299 |
| 15  | 509 | 333 | BENZOIC ACID, 4-CHLORO-2-NITRO-, METHYL ESTER                       | 215 |
| 16  | 489 | 306 | BENZENE, (2-BROMOETHENYL)-, (E)-                                    | 182 |
| 17  | 465 | 328 | 2-(4-CHLOROPHENYL)-1,3,2-DIOXABOROLANE                              | 182 |
| 18  | 452 | 335 | METHANONE, (4-BROMOPHENYL)-3-PYRIDINYL-                             | 267 |
| 19  | 445 | 308 | [1,10]PHENANTHROLINE-5,6-DIONE                                      | 210 |
| 20  | 434 | 323 | BENZOIC ACID, 4-BROMO-, METHYL ESTER                                | 214 |

, 26-Dec-2013 + 13:02:34

Ald 3 1090 (8.451)

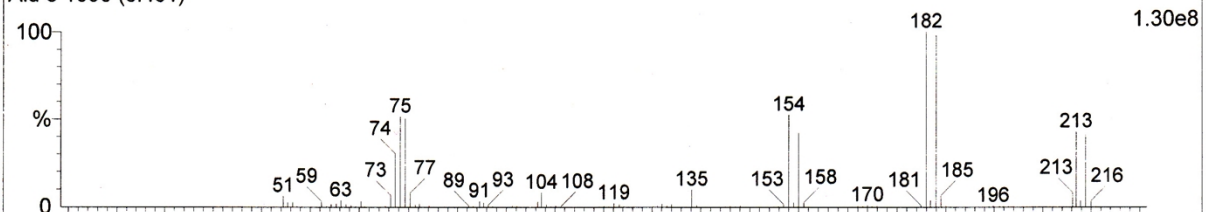

R:434

Nist 115957: BENZOIC ACID, 4-BROMO-, METHYL ESTER

1.30e8

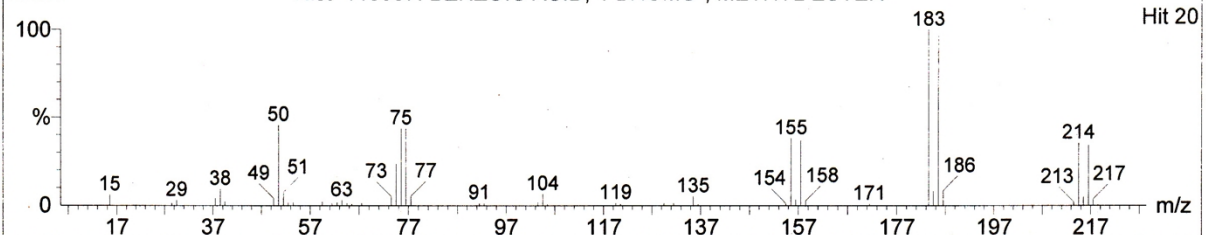

Hit 20

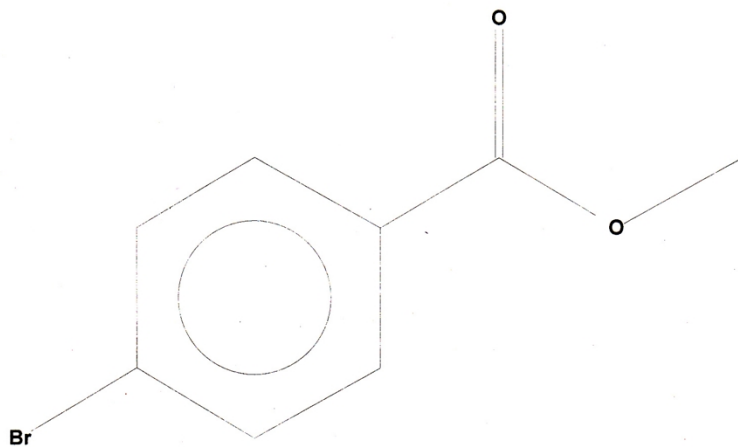

, 13-Feb-2014 + 11:17:01

Scan EI+  
TIC  
9.17e7

Ald 4  
100  
Area, Height

9.17;150;2198366;91677616

91%

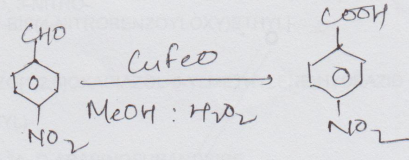

%

Time

9.81  
65  
503266  
8781485

|        |       |        |        |        |       |       |       |
|--------|-------|--------|--------|--------|-------|-------|-------|
| 8.38   | 9.03  | 9.46   | 10.05  | 10.37  | 10.68 | 11.20 | 11.44 |
| 77     | 76    | 120    | 65     | 65     | 65    | 65    | 65    |
| 3753   | 1305  | 17562  | 28129  | 6576   | 913   | 809   | 706   |
| 151687 | 68387 | 313820 | 712562 | 208800 | 65684 | 56210 | 43197 |



S. pratihar1

| Hit | REV | for | Compound Name                                                             | M.V |
|-----|-----|-----|---------------------------------------------------------------------------|-----|
| 1   | 928 | 920 | BENZOIC ACID, 4-NITRO-, METHYL ESTER                                      | 181 |
| 2   | 928 | 916 | 3-METHOXYCARBONYL-5-NITROPYRIDINE 1-OXIDE                                 | 198 |
| 3   | 874 | 856 | BENZOIC ACID, 3-NITRO-, METHYL ESTER                                      | 181 |
| 4   | 856 | 557 | N-(2-METHYL-3,5-DINITRO-PHENYL)-4-NITRO-BENZAMIDE                         | 346 |
| 5   | 855 | 626 | ETHYL 4-NITROBENZOYLFORMATE                                               | 223 |
| 6   | 853 | 498 | ACETAMIDE, 2,2,2-TRIFLUORO-N-(P-NITROPHENACYL)-                           | 276 |
| 7   | 842 | 625 | 4-NITROBENZOYL ISOTHIOCYANATE                                             | 208 |
| 8   | 831 | 631 | 4-NITROBENZOYL CHLORIDE                                                   | 188 |
| 9   | 826 | 554 | BENZOIC ACID, 4-NITRO-, (2-ACETYL-1-OXO-3-INDENYL) ESTER                  | 337 |
| 10  | 825 | 599 | BENZENECARBOTHIOIC ACID, 4-NITRO-, S-METHYL ESTER                         | 197 |
| 11  | 821 | 765 | 4-NITROBENZOIC HYDRAZIDE                                                  | 181 |
| 12  | 821 | 485 | BENZAMIDE, N-5H-1,3,2,4-DITHIA(3-SIV) DIAZOL-5-YLIDENE-4-NITRO-           | 268 |
| 13  | 811 | 616 | METHANONE, (4-NITROPHENYL)(4-BENZOYL-3-ISOXAZOYL)-                        | 322 |
| 14  | 808 | 589 | 2,5-CYCLOHEXADIENE-1,4-DIONE, 5-BROMO-2,3-DIMETHYL-, 1-OXIME, O-(4-NITRO  | 378 |
| 15  | 806 | 588 | 2,5-CYCLOHEXADIENE-1,4-DIONE, 5-CHLORO-2,3-DIMETHYL-, 1-OXIME, O-(4-NITRO | 334 |
| 16  | 805 | 585 | 2,5-CYCLOHEXADIENE-1,4-DIONE, 3-CHLORO-5-ISOPROPYL-2-METHYL-, 1-OXIME,    | 362 |
| 17  | 805 | 601 | (P-NITROBENZOYL)ACETONITRILE                                              | 190 |
| 18  | 803 | 581 | 2-CYCLOHEXENE-1,4-DIONE, 5,6-DICHLORO-2,3-DIMETHYL-, 1-OXIME, O-(4-NITROB | 370 |
| 19  | 800 | 591 | 3-(4-NITROBENZOYL)-2-THIOXO-4-THIAZOLYL 4-NITROBENZOATE                   | 437 |
| 20  | 796 | 551 | ETHANONE, 2,2-DIBROMO-1-(4-NITROPHENYL)-                                  | 327 |

, 13-Feb-2014 + 11:17:01

Ald 4 1433 (9.166)

2.06e7

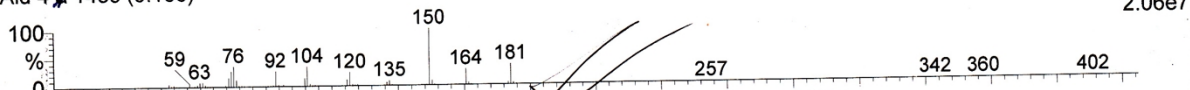

R:928 Nist 97504: BENZOIC ACID, 4-NITRO-, METHYL ESTER

Hit 1

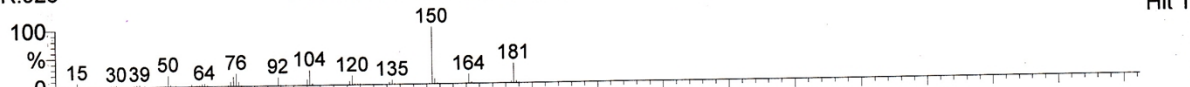

R:928 Nist 97503: 3-METHOXYCARBONYL-5-NITROPYRIDINE 1-OXIDE

Hit 2

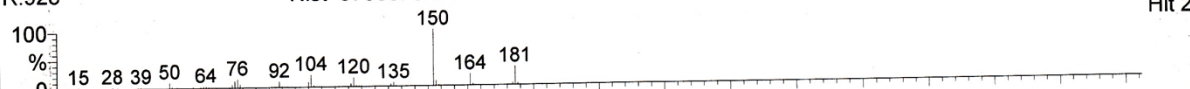

R:874 Nist 97103: BENZOIC ACID, 3-NITRO-, METHYL ESTER

Hit 3

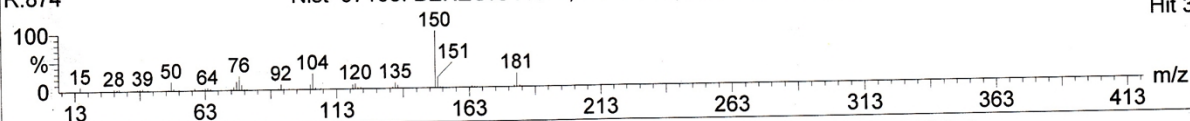

0,C:\TurboMass\DEFAULT.PRO\Data\B5,raw,31715320,4

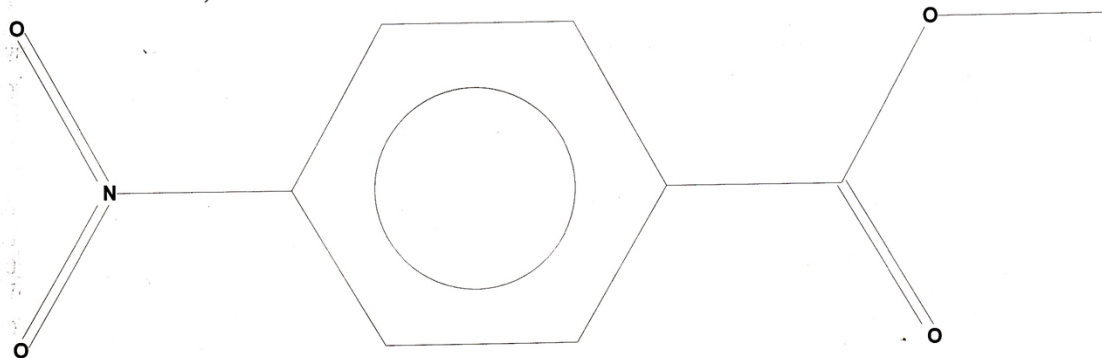

|    |     |     |                                                                      |     |
|----|-----|-----|----------------------------------------------------------------------|-----|
| 3  | 827 | 192 | 2,4-DIHYDROXY-O-(3-NITROBENZOYL)BENZALDOXIME                         | 304 |
| 4  | 730 | 694 | O-NITROBENZOIC ANHYDRIDE                                             | 316 |
| 5  | 704 | 509 | BENZALDEHYDE, 2-NITRO-                                               | 151 |
| 6  | 680 | 454 | BENZOIC ACID, 2-NITROSO-                                             | 151 |
| 7  | 665 | 640 | 1,2,3,5-TETRA-O-P-NITROBENZOYL-.BETA.-D-RIBOFURANOSE                 | 746 |
| 8  | 658 | 620 | 1,2-BENZENEDICARBOXYLIC ACID, 3-NITRO-                               | 211 |
| 9  | 657 | 618 | FURAN-3-AMINE, N-ACETYL-5-[1,2-BIS(4-NITROBENZOYLOXY)ETHYL]-         | 483 |
| 10 | 657 | 622 | BENZOIC ACID, 2-NITRO-                                               | 167 |
| 11 | 641 | 584 | NITROTERTHPHTHALIC ACID                                              | 211 |
| 12 | 631 | 451 | 2-HYDROXYBENZOIC ACID, (BENZO[1,2,5]OXADIAZOL-5-YLMETHYLENE)HYDRAZID | 282 |
| 13 | 631 | 484 | BENZOIC ACID, 4-SULFO-                                               | 202 |
| 14 | 627 | 481 | BENZOIC ACID, 4-(AMINOSULFONYL)-                                     | 201 |
| 15 | 621 | 457 | HALAZONE                                                             | 268 |
| 16 | 615 | 583 | 1,3,5-O-TRI-P-NITROBENZOYL-.BETA.-D-ARABINOFURANOSIDE                | 597 |
| 17 | 615 | 584 | INDENE-1-OL-3-ONE, 2-FLUORO-4-NITRO-                                 | 211 |
| 18 | 559 | 535 | 4-NITROPHENYLGLYOXYLIC ACID                                          | 196 |
| 19 | 556 | 505 | BENZALDEHYDE, 4-NITRO-, O-(3-NITROBENZOYL)OXIME                      | 315 |
| 20 | 550 | 336 | BENZOIC ACID, 4-(1-PERHYDROAZEPINYLAZO)-                             | 247 |

, 13-Feb-2014 + 11:17:01

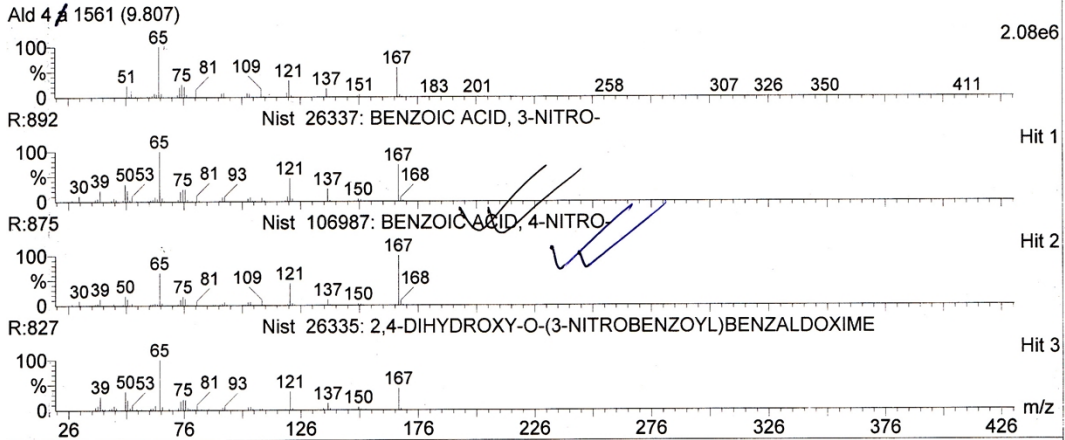

0,C:\TurboMass\DEFAULT.PRO\Data\B5,raw,31715320,4

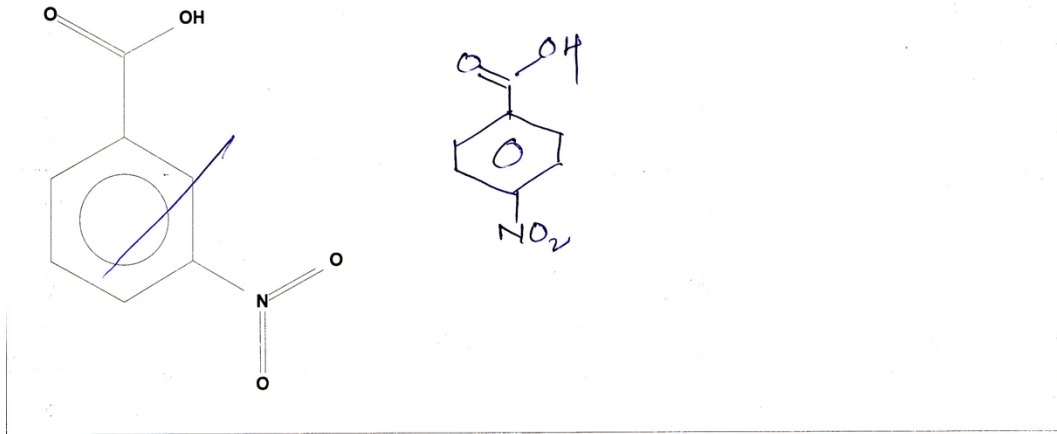

ht

5.92;184,44089748;1033513024

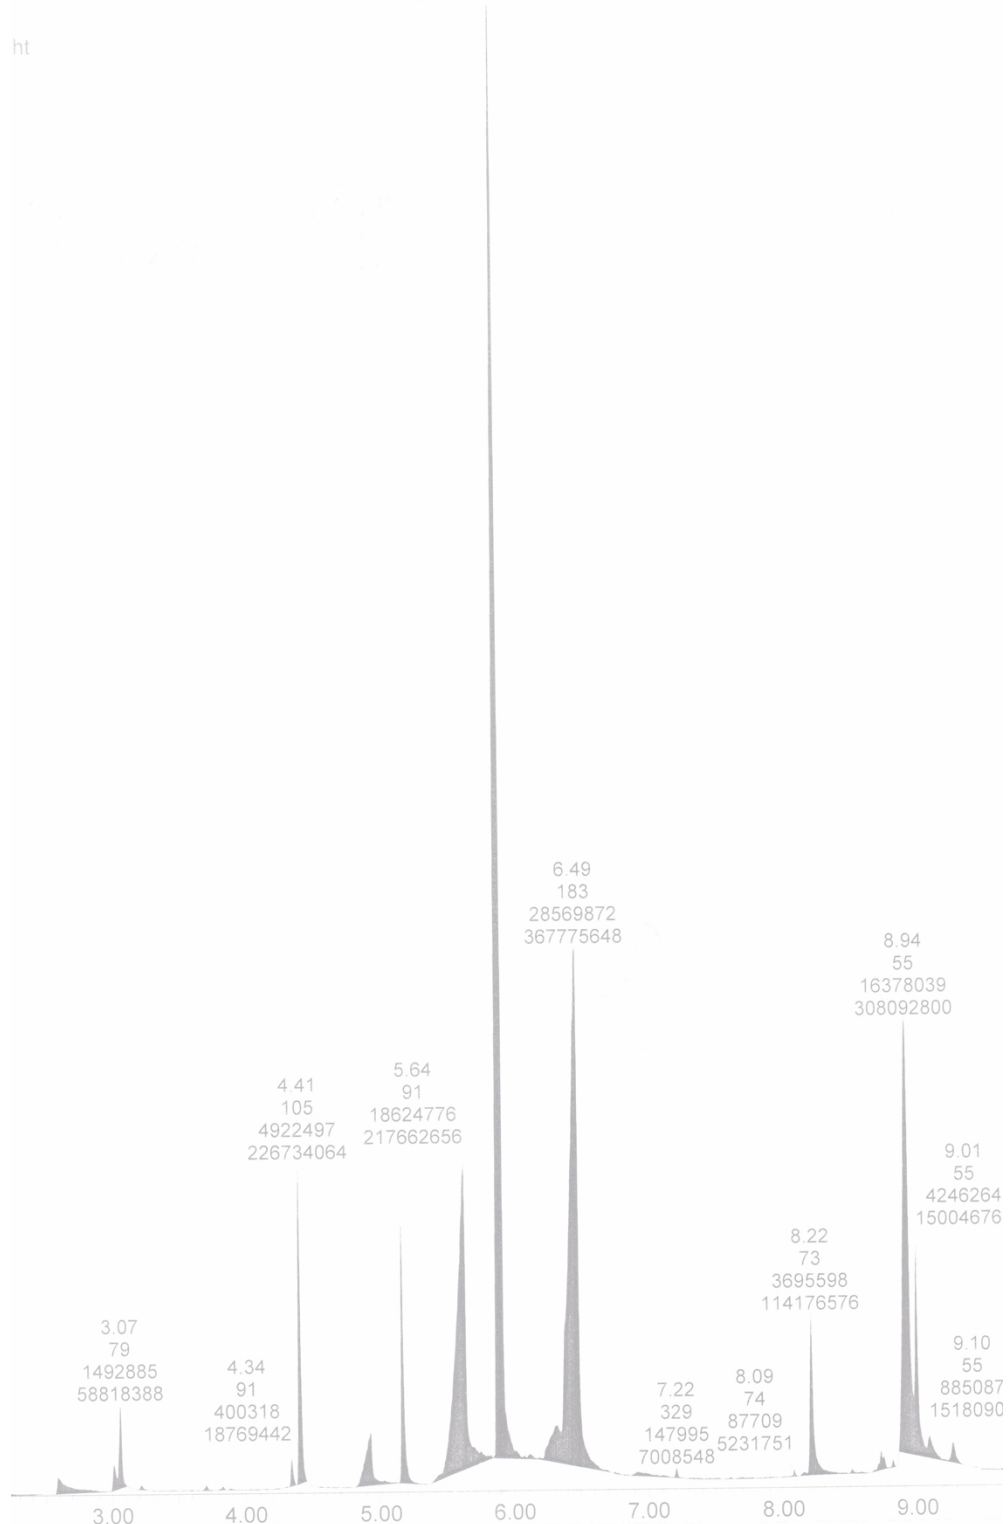

| Hit | REV | for | Compound Name                                                 | M.W |
|-----|-----|-----|---------------------------------------------------------------|-----|
| 1   | 743 | 623 | BENZOIC ACID, 2-BROMO-                                        | 200 |
| 2   | 706 | 507 | 1-BUTANONE, 1-(4-BROMOPHENYL)-4-CHLORO-                       | 260 |
| 3   | 705 | 511 | 3-BROMOBENZOIC ACID, CYCLOBUTYL ESTER                         | 254 |
| 4   | 689 | 588 | 4-BROMOBENZOIC ACID, 2-BUTYL ESTER                            | 256 |
| 5   | 688 | 463 | BENZHYDRAZIDE, 4-BROMO-N2-(4-BROMOBENZYLIDENE)-               | 380 |
| 6   | 684 | 652 | BENZOIC ACID, 3-BROMO-                                        | 200 |
| 7   | 683 | 604 | 3-BROMOBENZOIC ACID, 2-METHYLPROPYL ESTER                     | 256 |
| 8   | 682 | 584 | 2-BROMOBENZOIC ACID, 2-BUTYL ESTER                            | 256 |
| 9   | 681 | 569 | 2-BROMOBENZOIC ACID, UNDECYL ESTER                            | 354 |
| 10  | 673 | 577 | 2-BROMOBENZOIC ACID, 2-METHYLPROPYL ESTER                     | 256 |
| 11  | 667 | 606 | 2-BROMOBENZOIC ACID, BUTYL ESTER                              | 256 |
| 12  | 665 | 566 | 2-BROMOBENZOIC ACID, 2-ADAMANTYL ESTER                        | 334 |
| 13  | 664 | 583 | 4-BROMOBENZOIC ACID, NONYL ESTER                              | 326 |
| 14  | 662 | 581 | ETHANONE, 1-(4-BROMOPHENYL)-                                  | 198 |
| 15  | 661 | 547 | 3-BROMOBENZOIC ACID PYRIDIN-3-YLMETHYLENEHYDRAZIDE            | 300 |
| 16  | 658 | 577 | ETHANONE, 1-(3-BROMOPHENYL)-                                  | 198 |
| 17  | 656 | 555 | 1-PENTANONE, 1-(4-BROMOPHENYL)-                               | 240 |
| 18  | 655 | 463 | 4-BROMOBENZENAMIDE, N-(2-METHOXY-3,5-DIBROMOBENZYLIDENAMINO)- | 488 |
| 19  | 653 | 590 | BENZAMIDE, 2-BROMO-                                           | 198 |
| 20  | 651 | 545 | 4-BROMOBENZOIC ACID, CYCLOPENTYL ESTER                        | 268 |

, 02-May-2014 + 11:13:27

N15 897 (6.485)

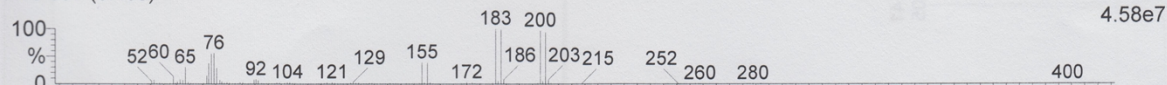

R:743

Nist 123969: BENZOIC ACID, 2-BROMO-

Hit 1

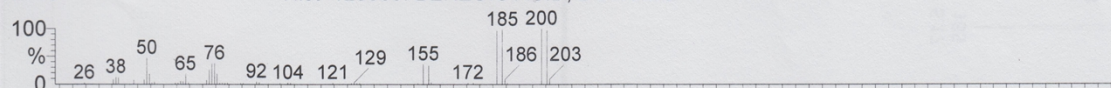

R:706

Nist 116131: 1-BUTANONE, 1-(4-BROMOPHENYL)-4-CHLORO-

Hit 2

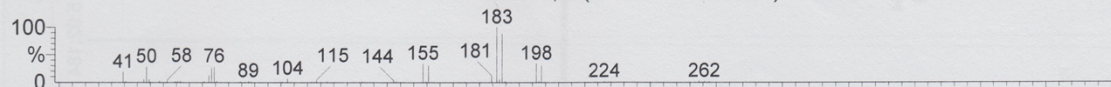

R:705

Nist 116079: 3-BROMOBENZOIC ACID, CYCLOBUTYL ESTER

Hit 3

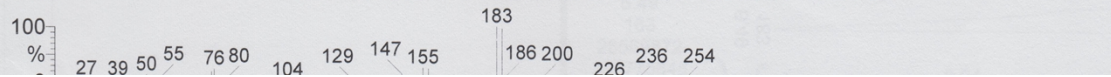

✓

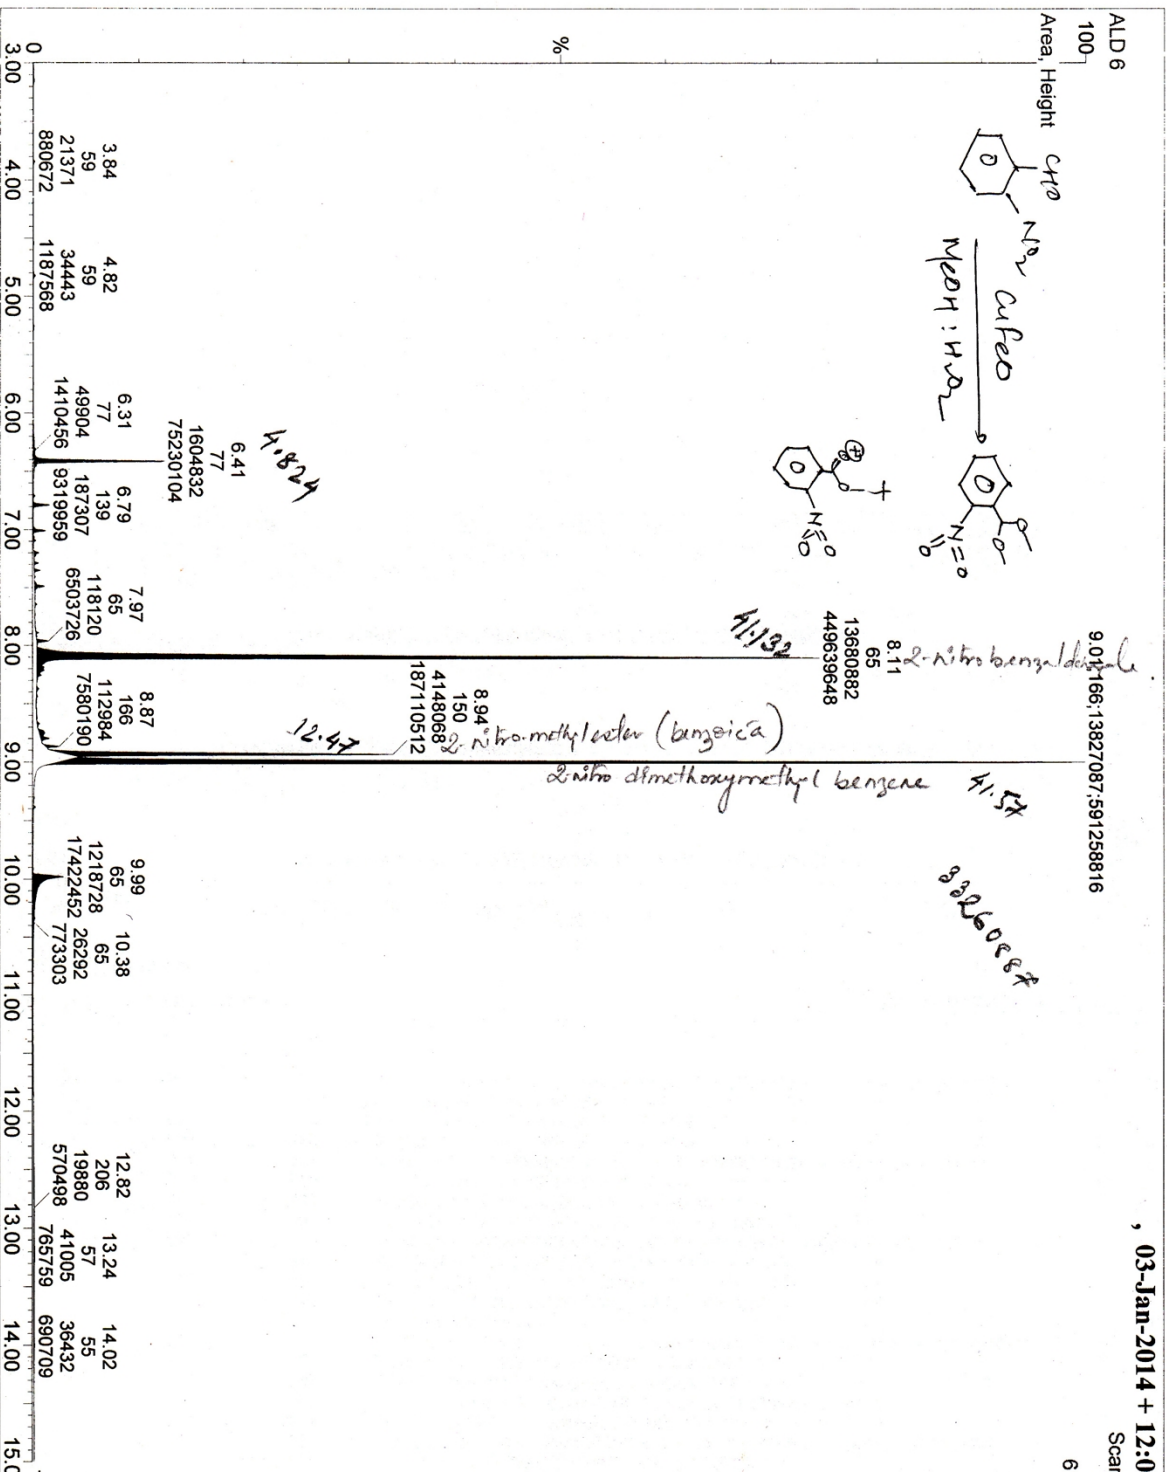

| Hit | REV | for | Compound Name                                                           | M.V |
|-----|-----|-----|-------------------------------------------------------------------------|-----|
| 1   | 917 | 888 | BENZENE, 1-(DIMETHOXYMETHYL)-2-NITRO-                                   | 197 |
| 2   | 765 | 623 | PYRIMIDINE-2,4(1H,3H)-DIONE, 6-CHLORO-1-(4-METHOXY-3-NITROBENZYL)-      | 311 |
| 3   | 746 | 588 | BENZENAMINE, N,N-DIMETHYL-3-NITRO-                                      | 166 |
| 4   | 709 | 601 | 7,7-DIMETHOXY-5-METHYLENEBICYCLO[2.2.1]HEPT-2-ENE                       | 166 |
| 5   | 706 | 560 | 2-METHOXY-5-METHYLBENZOIC ACID                                          | 166 |
| 6   | 697 | 553 | 2-METHOXY-4-METHYLBENZOIC ACID                                          | 166 |
| 7   | 695 | 532 | PYRIMIDINE-2,4(1H,3H)-DIONE, 6-CHLORO-1-(3-METHOXY-4-NITROBENZYL)-3-MET | 321 |
| 8   | 687 | 570 | P-ANISAMIDOXIME                                                         | 166 |
| 9   | 679 | 442 | 2-BROMO-1,3-BIS(METHOXYMETHYL)BENZENE                                   | 241 |
| 10  | 678 | 484 | BENZALDEHYDE, 2,4-DIMETHOXY-                                            | 166 |
| 11  | 675 | 518 | BENZOIC ACID, 3-METHOXY-4-METHYL-                                       | 166 |
| 12  | 663 | 412 | 3-PHENYL-PROPIONIC ACID (4-METHOXY-BENZYLIDENE)HYDRAZIDE                | 282 |
| 13  | 661 | 499 | PHENOL, 4-(METHOXYMETHYL)-2,6-DIMETHYL-                                 | 166 |
| 14  | 641 | 396 | 2-PHENYL-3-(4-NITROPHENYL)-OXIRANE                                      | 241 |
| 15  | 639 | 528 | BENZOIC ACID, 2-METHOXY-6-METHYL-                                       | 166 |
| 16  | 634 | 357 | 4-METHOXYBENZENAMIDE, N-(3,4-METHYLENEDIOXYBENZYLIDENAMINO)-            | 296 |
| 17  | 634 | 582 | BENZENE, 1,4-BIS(METHOXYMETHYL)-                                        | 166 |
| 18  | 629 | 533 | ETHYL(DIMETHYL)BENZYLOXYSILANE                                          | 194 |
| 19  | 627 | 540 | N-DIMETHOXYMETHYLENEANILINE                                             | 166 |
| 20  | 625 | 368 | ACETOHYDRAZIDE, 2-(2-ISOPROPYL-5-METHYLPHENOXY)-N2-BENZYLIDENO-         | 310 |

, 03-Jan-2014 + 12:07:42

ALD 6 1201 (9.006)

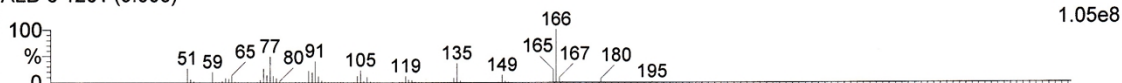

R:917 Nist 106780: BENZENE, 1-(DIMETHOXYMETHYL)-2-NITRO-

Hit 1

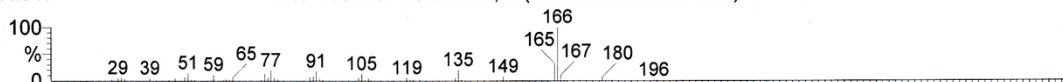

R:765 Nist 106576: PYRIMIDINE-2,4(1H,3H)-DIONE, 6-CHLORO-1-(4-METHOXY-3-NITROBENZYL)

Hit 2

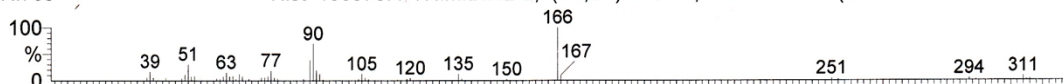

R:746 Nist 106552: BENZENAMINE, N,N-DIMETHYL-3-NITRO-

Hit 3

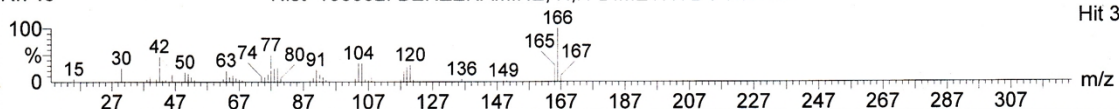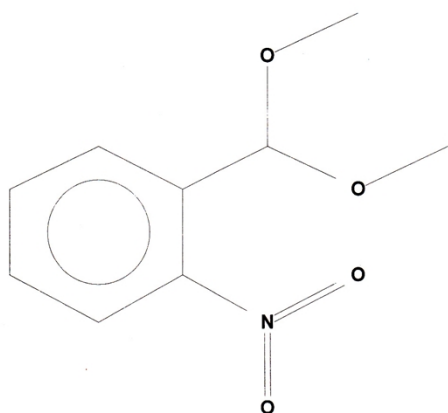

| Hit | REV | for | Compound Name                                                           | M.W |
|-----|-----|-----|-------------------------------------------------------------------------|-----|
| 1   | 872 | 803 | BENZOIC ACID, 2-NITRO-, METHYL ESTER                                    | 181 |
| 2   | 835 | 611 | BENZAMIDE, 2-NITRO-N-(2-FLUORO-5-NITROPHENYL)-                          | 305 |
| 3   | 811 | 671 | BENZAMIDE, N-[3-(2,2,2-TRIFLUOROETHOXY)-5-NITROPHENYL]-2-NITRO-         | 385 |
| 4   | 801 | 721 | P-TOLYL O-NITRO BENZOATE                                                | 257 |
| 5   | 785 | 638 | METHANONE, (4-NITROPHENYL)(4-BENZOYL-3-ISOXAZOYL)-                      | 322 |
| 6   | 783 | 621 | 3-(PHENACYLAMINO)BENZOIC ACID                                           | 255 |
| 7   | 777 | 694 | BENZAMIDE, 2-NITRO-                                                     | 166 |
| 8   | 765 | 679 | BENZOIC ACID, 4-(2-NITROBENZOYLOXY)-                                    | 287 |
| 9   | 758 | 514 | BENZOIC ACID, 4-NITRO-, (2-ACETYL-1-OXO-3-INDENYL) ESTER                | 337 |
| 10  | 752 | 631 | N-METHYL-4-(2-NITROBENZAMIDO)PHTHALIMIDE                                | 325 |
| 11  | 745 | 629 | BUT-2-YNE-1,4-DIOL, O,O'-BIS(3-NITROBENZOYL)-                           | 384 |
| 12  | 742 | 639 | BENZOIC ACID, 3-NITRO-, (4-FORMYL-2-METHOXYPHENYL) ESTER                | 307 |
| 13  | 741 | 672 | BENZALDEHYDE, 4-NITRO-                                                  | 151 |
| 14  | 733 | 534 | 2-CYCLOHEXENE-1,4-DIONE, 5,6-DICHLORO-3-ISOPROPYL-6-METHYL-, 1-OXIME, O | 398 |
| 15  | 729 | 458 | O-NITROBENZALDOXIME-O-METHYL ETHER                                      | 180 |
| 16  | 728 | 642 | BENZAMIDE, 2-NITRO-N-(3-PYRIDYL)-                                       | 243 |
| 17  | 727 | 594 | 2,5-CYCLOHEXADIENE-1,4-DIONE, 3-CHLORO-5-ISOPROPYL-2-METHYL-, 1-OXIME,  | 362 |
| 18  | 726 | 630 | O-NITROBENZOYL CHLORIDE                                                 | 185 |
| 19  | 725 | 631 | BENZAMIDE, 3-NITRO-N-(2-HYDROXY-4-NITROPHENYL)-                         | 303 |
| 20  | 716 | 605 | BENZAMIDE, N-(4-CYANOMETHYLPHENYL)-2-NITRO-                             | 287 |

, 03-Jan-2014 + 12:07:42

ALD 6 1187 (8.936)

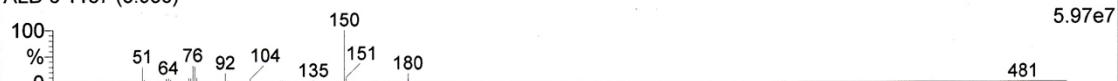

R:872 Nist 96947: BENZOIC ACID, 2-NITRO-, METHYL ESTER

Hit 1

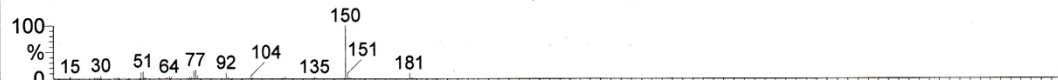

R:835 Nist 96829: BENZAMIDE, 2-NITRO-N-(2-FLUORO-5-NITROPHENYL)-

Hit 2

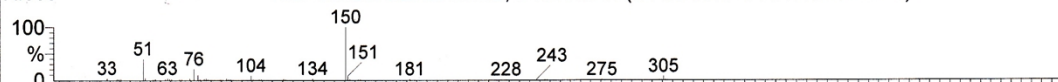

R:811 Nist 96830: BENZAMIDE, N-[3-(2,2,2-TRIFLUOROETHOXY)-5-NITROPHENYL]-2-NITRO-

Hit 3

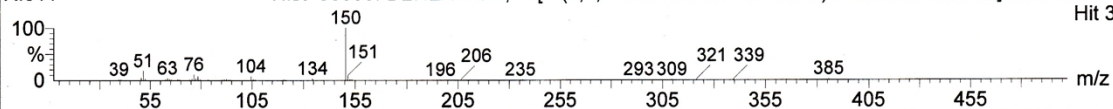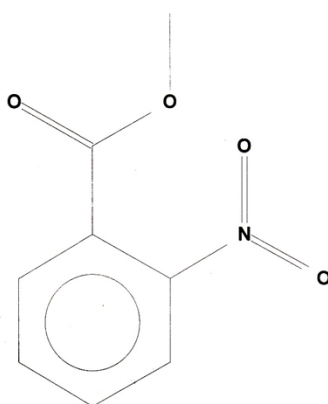

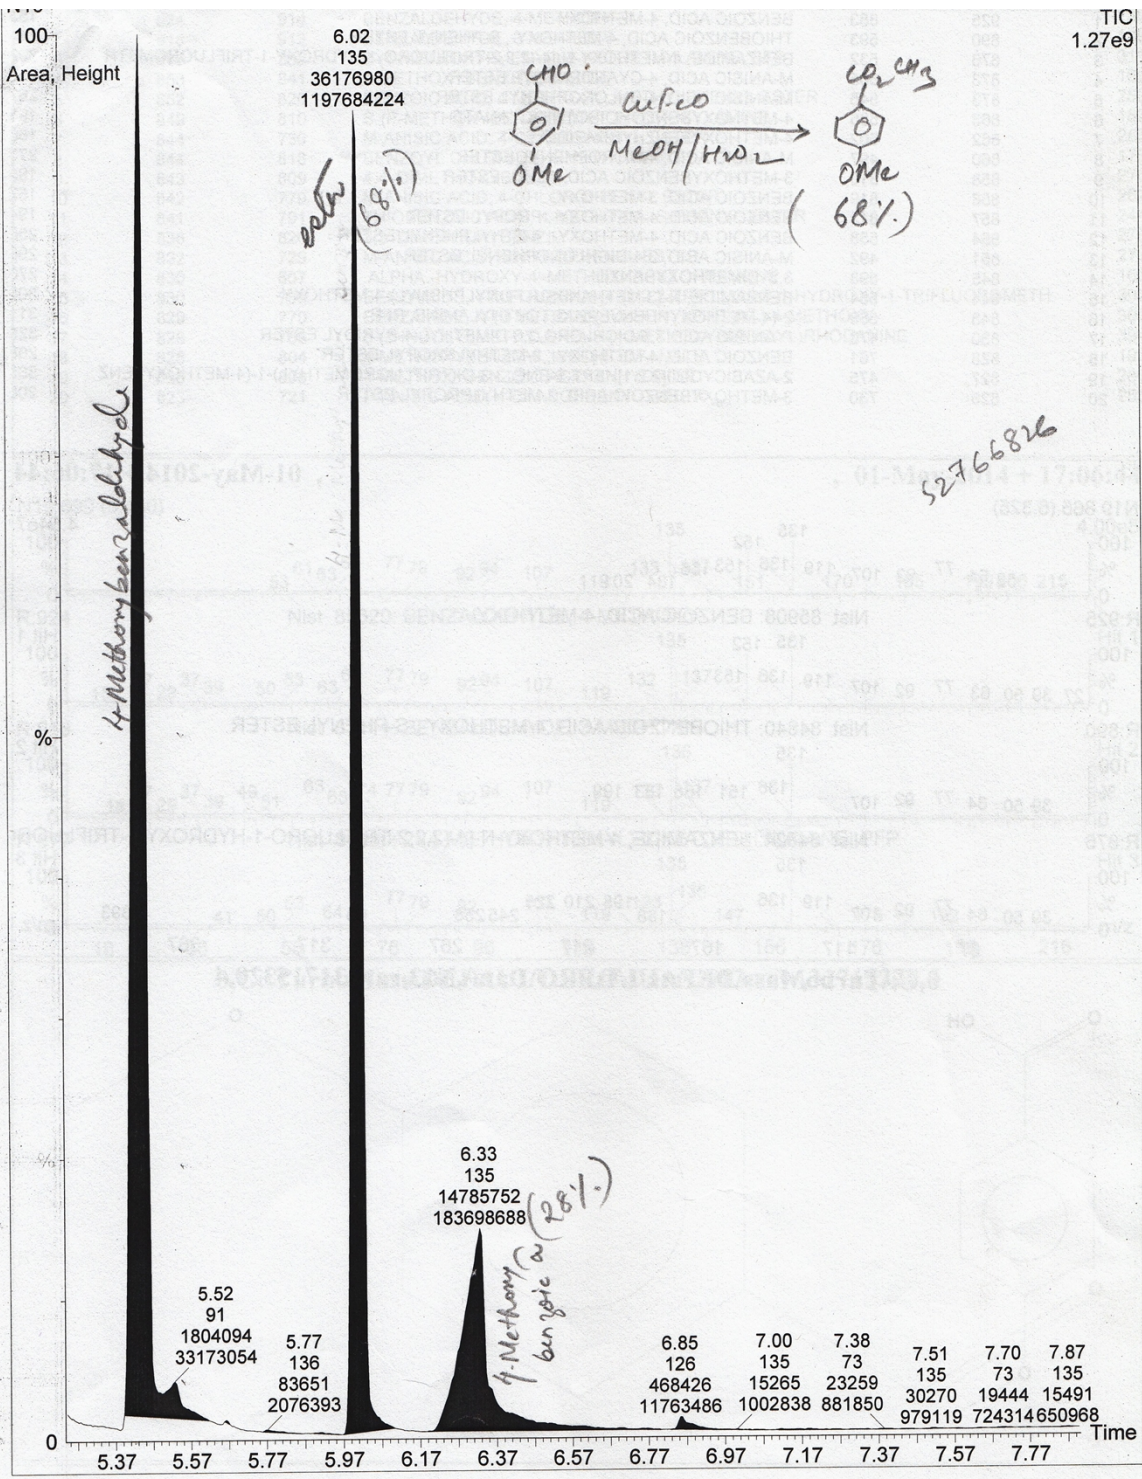

4-Methoxybenzaldehyde

6.02  
135  
36176980  
1197684224  
*68%*

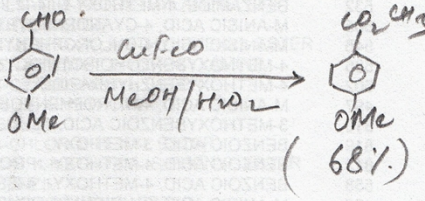

6.33  
135  
14785752  
183698688  
*4-Methoxybenzoate (28%)*

52766826

TIC  
1.27e9



S PRAT

| Hit | REV | for | Compound Name                                                           |    |
|-----|-----|-----|-------------------------------------------------------------------------|----|
| 1   | 925 | 883 | BENZOIC ACID, 4-METHOXY-                                                |    |
| 2   | 890 | 593 | THIOBENZOIC ACID, 4-METHOXY-, S-PHENYL ESTER                            |    |
| 3   | 876 | 532 | BENZAMIDE, 4-METHOXY-N-[4-(2,2,2-TRIFLUORO-1-HYDROXY-1-TRIFLUOROMETH    |    |
| 4   | 873 | 505 | M-ANISIC ACID, 4-CYANOPHENYL ESTER                                      |    |
| 5   | 873 | 545 | M-ANISIC ACID, 4-CHLOROPHENYL ESTER                                     | 2  |
| 6   | 863 | 586 | 4-METHOXYBENZOYL ISOTHIOCYANATE                                         | 19 |
| 7   | 862 | 602 | 4-METHOXYBENZHYDRAZIDE                                                  | 16 |
| 8   | 860 | 497 | M-ANISIC ACID, 4-NITROPHENYL ESTER                                      | 27 |
| 9   | 858 | 810 | 3-METHOXYBENZOIC ACID, ALLYL ESTER                                      | 19 |
| 10  | 858 | 819 | BENZOIC ACID, 3-METHOXY-                                                | 15 |
| 11  | 857 | 812 | BENZOIC ACID, 4-METHOXY-, PROPYL ESTER                                  | 19 |
| 12  | 854 | 588 | BENZOIC ACID, 4-METHOXY-, 4-ETHYLPHENYL ESTER                           | 25 |
| 13  | 851 | 492 | M-ANISIC ACID, 3,4-DICHLOROPHENYL ESTER                                 | 29 |
| 14  | 845 | 598 | 3,3'-DIMETHOXYBENZIL                                                    | 27 |
| 15  | 844 | 564 | BENZAMIDE, N-(3-METHANESULFONYLPHENYL)-4-METHOXY-                       | 30 |
| 16  | 843 | 589 | 2-(4-METHOXYPHENYL)-2-KETOETHYLAMINE, PFP                               | 31 |
| 17  | 830 | 473 | P-ANISIC ACID 3,5-DICHLORO-2,6-DIMETHYL-4-PYRIDYL ESTER                 | 32 |
| 18  | 828 | 761 | BENZOIC ACID, 4-METHOXY-, 2-METHYLPROPYL ESTER                          | 20 |
| 19  | 827 | 475 | 2-AZABICYCLO[2.2.1]HEPT-5-ENE, 3,3-DI(TRIFLUOROMETHYL)-1-(4-METHOXYBENZ | 36 |
| 20  | 825 | 730 | 3-METHOXYBENZOIC ACID, 2-METHYLPROPYL ESTER                             | 20 |

, 01-May-2014 + 17:06:44

N19 865 (6.325)

4.54e7

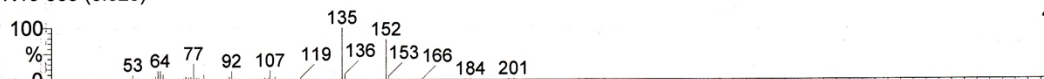

R:925 Nist 85908: BENZOIC ACID, 4-METHOXY-

Hit 1

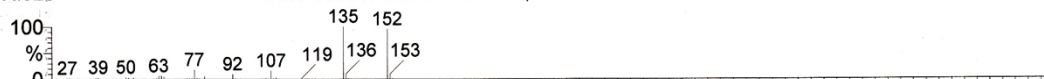

R:890 Nist 84840: THIOBENZOIC ACID, 4-METHOXY-, S-PHENYL ESTER

Hit 2

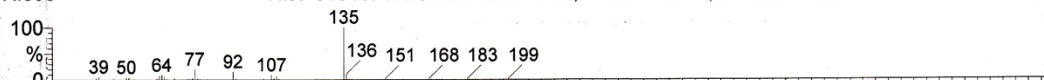

R:876 Nist 84824: BENZAMIDE, 4-METHOXY-N-[4-(2,2,2-TRIFLUORO-1-HYDROXY-1-TRIFLUORO

Hit 3

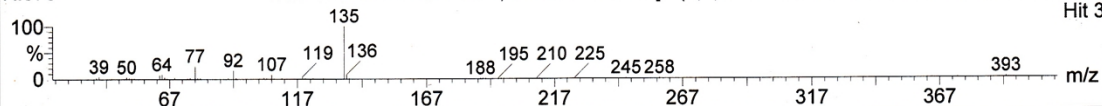

0,C:\TurboMass\DEFAULT.PRO\Data\,N13,raw,31715320,4

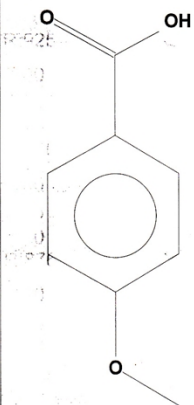

| Hit | REV | for | Compound Name                                                           | M.V |
|-----|-----|-----|-------------------------------------------------------------------------|-----|
| 1   | 958 | 938 | BENZOIC ACID, 4-METHOXY-, METHYL ESTER                                  | 166 |
| 2   | 933 | 875 | M-ANISIC HYDRAZIDE                                                      | 166 |
| 3   | 930 | 889 | BENZOIC ACID, 3-METHOXY-, METHYL ESTER                                  | 166 |
| 4   | 926 | 716 | M-ANISIC ACID, 4-CHLOROPHENYL ESTER                                     | 282 |
| 5   | 922 | 740 | S-(P-METHOXYBENZOYL)THIOHYDROXYLAMINE                                   | 183 |
| 6   | 922 | 896 | 4-METHOXYBENZHYDRAZIDE                                                  | 166 |
| 7   | 918 | 746 | BENZOIC ACID, 4-METHOXY-, 4-ETHYLPHENYL ESTER                           | 256 |
| 8   | 917 | 703 | BENZAMIDE, 4-METHOXY-N-[4-(2,2,2-TRIFLUORO-1-HYDROXY-1-TRIFLUOROMETH    | 393 |
| 9   | 915 | 743 | 3,3'-DIMETHOXYBENZIL                                                    | 270 |
| 10  | 914 | 718 | 5-(3-INDOLYLMETHYLENE)-3-(4-METHOXYBENZOYL)RHODANINE                    | 394 |
| 11  | 912 | 734 | BENZOYL CHLORIDE, 4-METHOXY-                                            | 170 |
| 12  | 912 | 878 | .ALPHA.-HYDROXY-4'-METHOXYACETOPHENONE                                  | 166 |
| 13  | 911 | 743 | 2-(4-METHOXYPHENYL)-2-KETOETHYLAMINE, PFP                               | 311 |
| 14  | 911 | 743 | 4-METHOXYBENZOIC ACID ANHYDRIDE                                         | 286 |
| 15  | 905 | 735 | 1-PROPANONE, 1-(3-METHOXYPHENYL)-                                       | 164 |
| 16  | 904 | 684 | M-ANISIC ACID, 4-CYANOPHENYL ESTER                                      | 253 |
| 17  | 904 | 731 | 4-METHOXYBENZOYL ISOTHIOCYANATE                                         | 193 |
| 18  | 892 | 668 | M-ANISIC ACID, 4-NITROPHENYL ESTER                                      | 273 |
| 19  | 892 | 700 | THIOBENZOIC ACID, 4-METHOXY-, S-PHENYL ESTER                            | 244 |
| 20  | 886 | 669 | 4-METHOXYBENZOIC ACID, 2,6-DIMETHYL-4-(2,2,2-TRIFLUORO-1-HYDROXY-1-TRIF | 422 |

, 01-May-2014 + 17:06:44

N19 803 (6.015)

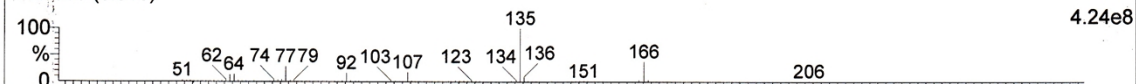

R:958 Nist 86068: BENZOIC ACID, 4-METHOXY-, METHYL ESTER

Hit 1

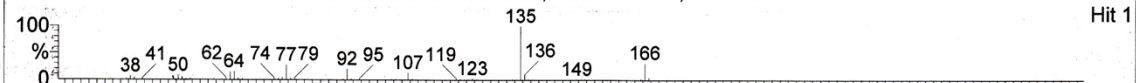

R:933 Nist 86073: M-ANISIC HYDRAZIDE

Hit 2

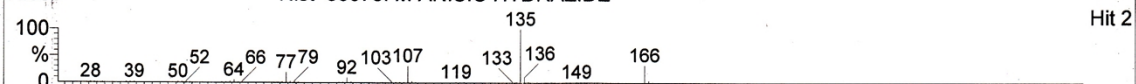

R:930 Nist 86072: BENZOIC ACID, 3-METHOXY-, METHYL ESTER

Hit 3

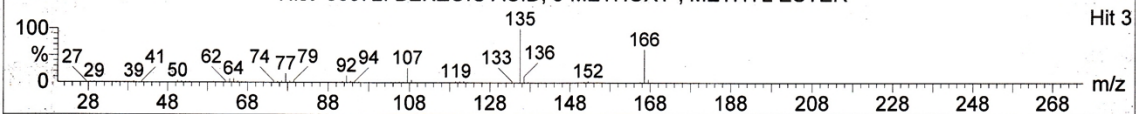

0,C:\TurboMass\DEFAULT.PRO\Data\,N13,raw,31715320,4

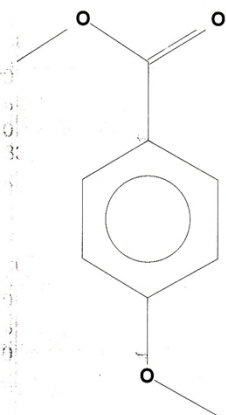

, 26-Dec-2013 + 12:43:43

Scan EI+  
TIC  
8.66e8

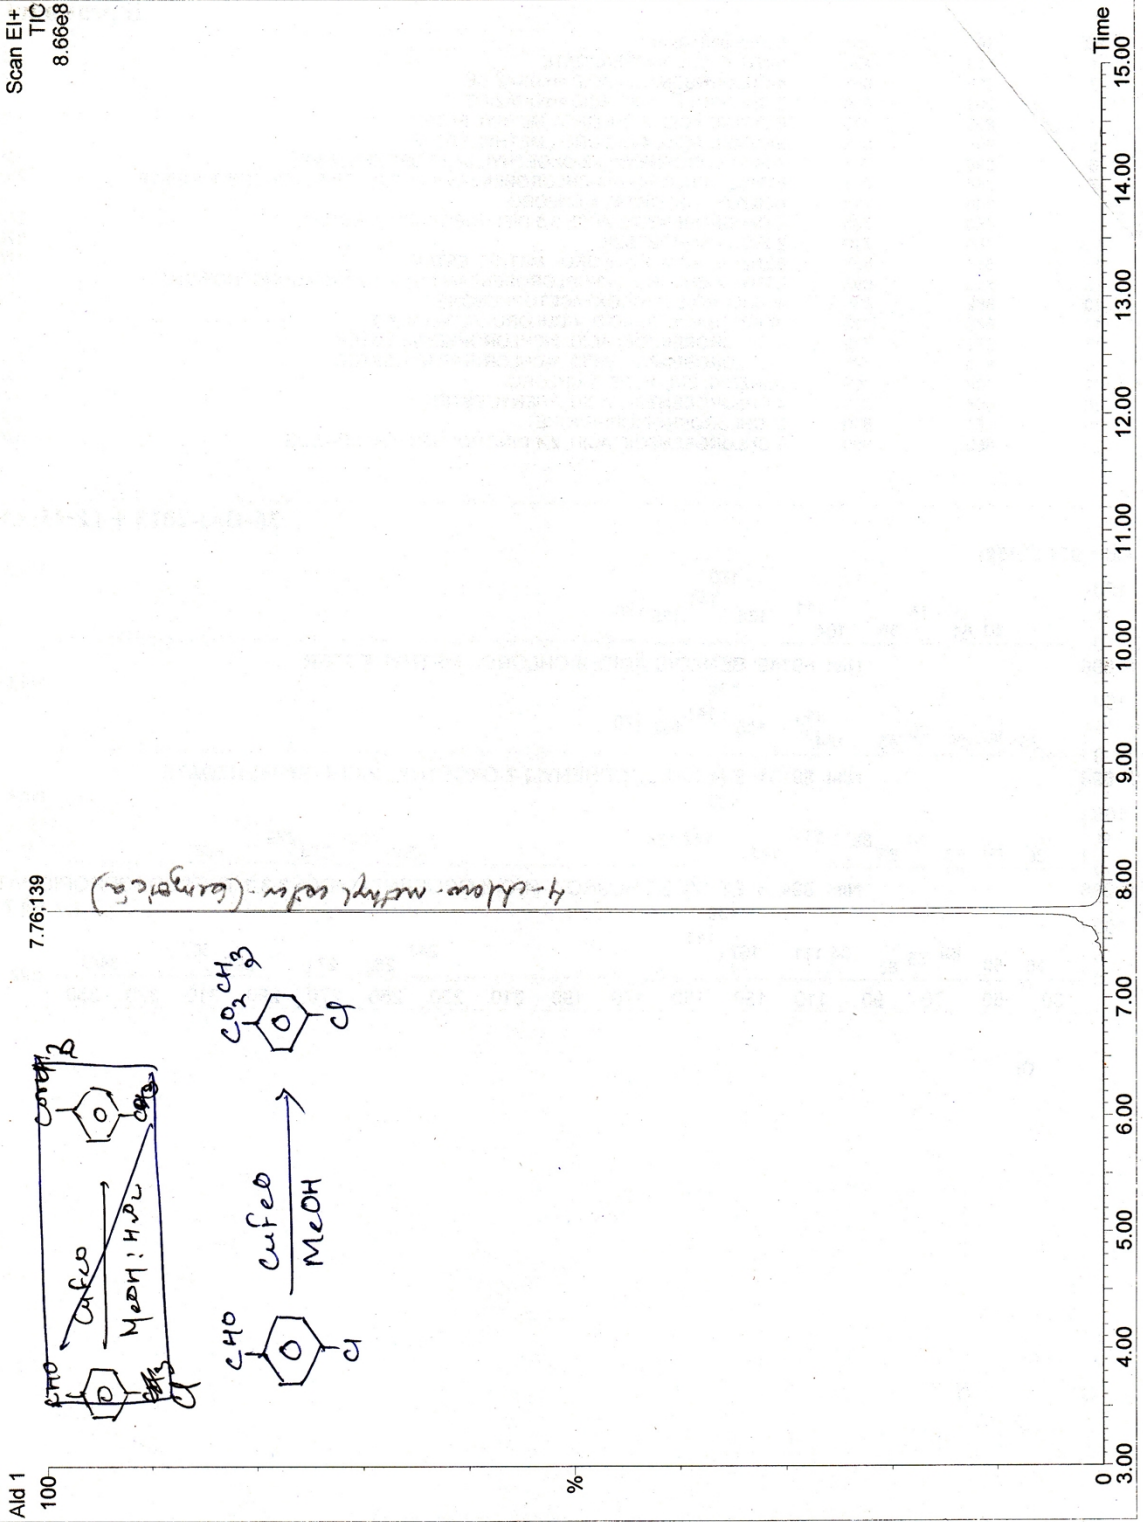

7.76139  
4-methoxy-methyl-ester (cempicid)

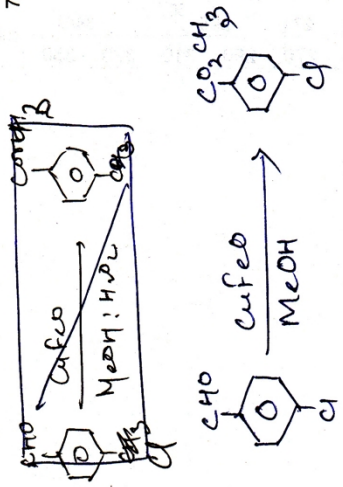

| Hit | REV | for | Compound Name                                                  | M.V |
|-----|-----|-----|----------------------------------------------------------------|-----|
| 1   | 913 | 750 | VINYL O-CHLOROBENZOATE                                         | 182 |
| 2   | 909 | 851 | 4-CHLOROBENZOIC ACID HYDRAZIDE                                 | 170 |
| 3   | 903 | 850 | 2-CHLOROBENZOIC ACID HYDRAZIDE                                 | 170 |
| 4   | 899 | 853 | BENZOIC ACID, 3-CHLORO-, METHYL ESTER                          | 170 |
| 5   | 898 | 851 | BENZOIC ACID, 4-CHLORO-, METHYL ESTER                          | 170 |
| 6   | 898 | 706 | 2-(4-CHLOROPHENYL)-2-OXOETHYL 2-CHLOROBENZOATE                 | 308 |
| 7   | 888 | 701 | ETHYL 2-CHLORO-2-(4-CHLOROBENZAMIDO)-3,3,3-TRIFLUOROPROPIONATE | 343 |
| 8   | 886 | 728 | BENZOYL CHLORIDE, 4-CHLORO-                                    | 174 |
| 9   | 886 | 735 | 4-CHLOROBENZOIC ACID, 3,5-DIFLUOROPHENYL ESTER                 | 268 |
| 10  | 885 | 710 | 2,2'-DICHLOROBENZIL                                            | 278 |
| 11  | 884 | 828 | BENZOIC ACID, 2-CHLORO-, METHYL ESTER                          | 170 |
| 12  | 883 | 693 | ETHYL 2-CHLORO-2-(3-CHLOROBENZAMIDO)-3,3,3-TRIFLUOROPROPIONATE | 343 |
| 13  | 882 | 836 | 4'-CHLORO-2-HYDROXYACETOPHENONE                                | 170 |
| 14  | 876 | 713 | BENZENEACETIC ACID, 4-CHLORO-.ALPHA.-OXO-                      | 184 |
| 15  | 872 | 718 | 4-CHLOROBENZOIC ACID, 2-CHLOROPHENYL ESTER                     | 268 |
| 16  | 870 | 725 | 2-CHLOROBENZOIC ACID, 2-CHLOROPHENYL ESTER                     | 268 |
| 17  | 865 | 709 | BENZOYL CHLORIDE, 2-CHLORO-                                    | 174 |
| 18  | 864 | 713 | 4-CHLOROBENZOIC ACID, PHENYL ESTER                             | 232 |
| 19  | 861 | 810 | M-CHLOROPROPIOPHENONE                                          | 168 |
| 20  | 859 | 695 | 4-CHLOROBENZOIC ACID, 2,4-DINITROPHENYLHYDRAZIDE               | 338 |

, 26-Dec-2013 + 12:43:43

Ald 1 951 (7.755)

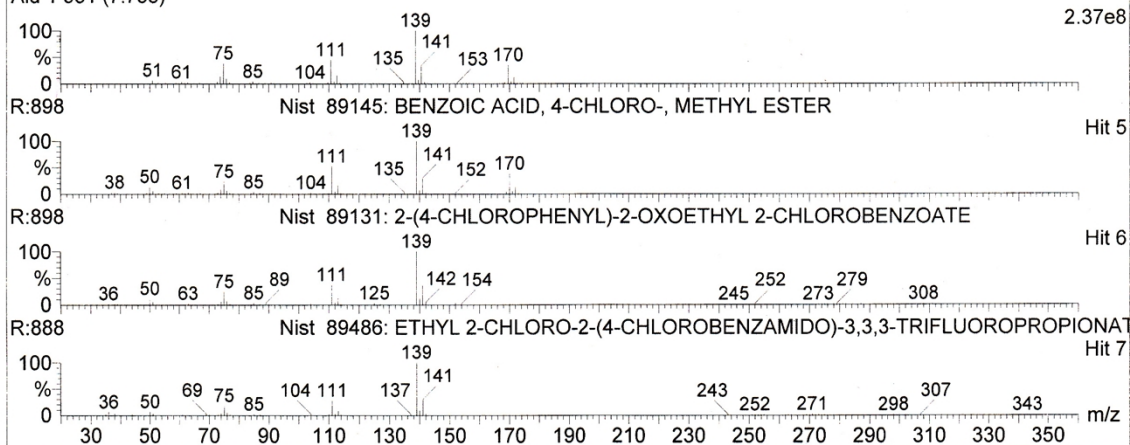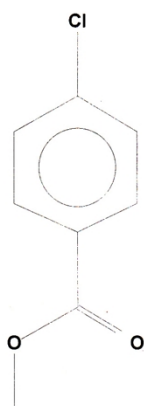

, 02-May-2014 + 11:34:02

Scan EI+  
TIC  
1.46e9

N27  
100

5.49;139;70627520;1452183040

Area, Height

%

0

Time

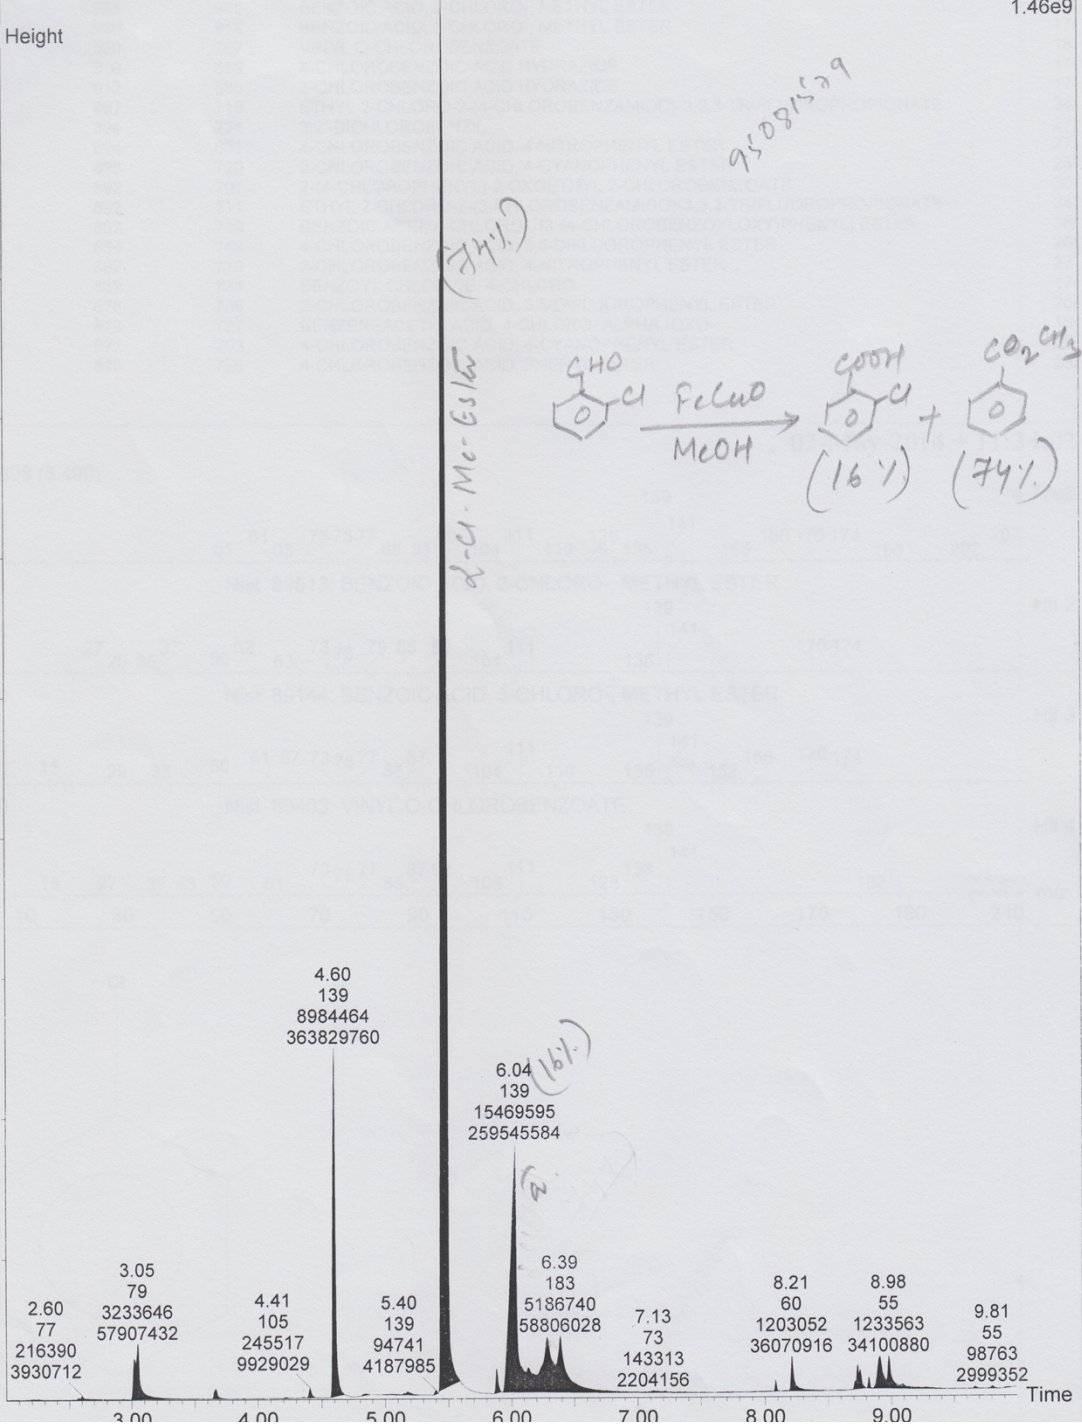

| Hit | REV | for | Compound Name                                                  | M.V |
|-----|-----|-----|----------------------------------------------------------------|-----|
| 1   | 936 | 921 | BENZOIC ACID, 4-CHLORO-, METHYL ESTER                          | 170 |
| 2   | 931 | 905 | BENZOIC ACID, 2-CHLORO-, METHYL ESTER                          | 170 |
| 3   | 930 | 918 | BENZOIC ACID, 3-CHLORO-, METHYL ESTER                          | 170 |
| 4   | 920 | 767 | VINYL O-CHLOROBENZOATE                                         | 182 |
| 5   | 919 | 889 | 4-CHLOROBENZOIC ACID HYDRAZIDE                                 | 170 |
| 6   | 912 | 885 | 2-CHLOROBENZOIC ACID HYDRAZIDE                                 | 170 |
| 7   | 897 | 716 | ETHYL 2-CHLORO-2-(4-CHLOROBENZAMIDO)-3,3,3-TRIFLUOROPROPIONATE | 343 |
| 8   | 894 | 724 | 2,2'-DICHLOROBENZIL                                            | 278 |
| 9   | 894 | 681 | 4-CHLOROBENZOIC ACID, 4-NITROPHENYL ESTER                      | 271 |
| 10  | 893 | 720 | 2-CHLOROBENZOIC ACID, 4-CYANOPHENYL ESTER                      | 251 |
| 11  | 892 | 707 | 2-(4-CHLOROPHENYL)-2-OXOETHYL 2-CHLOROBENZOATE                 | 308 |
| 12  | 892 | 711 | ETHYL 2-CHLORO-2-(3-CHLOROBENZAMIDO)-3,3,3-TRIFLUOROPROPIONATE | 343 |
| 13  | 887 | 739 | BENZOIC ACID, 4-CHLORO-, [3-(4-CHLOROBENZOYLOXY)PHENYL] ESTER  | 386 |
| 14  | 884 | 742 | 4-CHLOROBENZOIC ACID, 3,5-DIFLUOROPHENYL ESTER                 | 266 |
| 15  | 882 | 713 | 2-CHLOROBENZOIC ACID, 4-NITROPHENYL ESTER                      | 271 |
| 16  | 882 | 734 | BENZOYL CHLORIDE, 4-CHLORO-                                    | 174 |
| 17  | 878 | 736 | 2-CHLOROBENZOIC ACID, 3,5-DIFLUOROPHENYL ESTER                 | 266 |
| 18  | 878 | 727 | BENZENEACETIC ACID, 4-CHLORO-ALPHA-OXO-                        | 184 |
| 19  | 877 | 703 | 4-CHLOROBENZOIC ACID, 4-CYANOPHENYL ESTER                      | 251 |
| 20  | 873 | 728 | 4-CHLOROBENZOIC ACID, PHENYL ESTER                             | 232 |

, 02-May-2014 + 11:34:02

N27 698 (5.490)

4.77e8

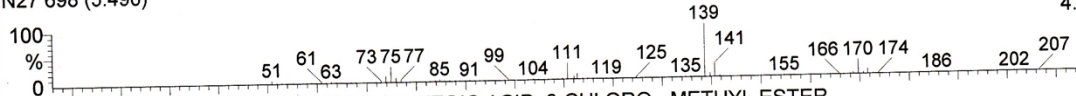

R:931

Nist 89513: BENZOIC ACID, 2-CHLORO-, METHYL ESTER

Hit 2

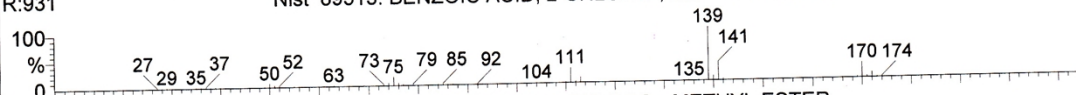

R:930

Nist 89144: BENZOIC ACID, 3-CHLORO-, METHYL ESTER

Hit 3

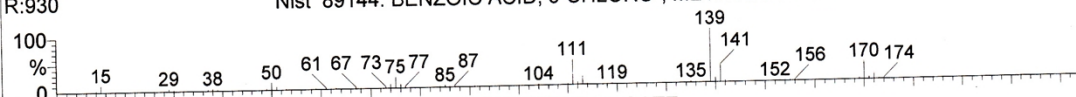

R:920

Nist 89403: VINYL O-CHLOROBENZOATE

Hit 4

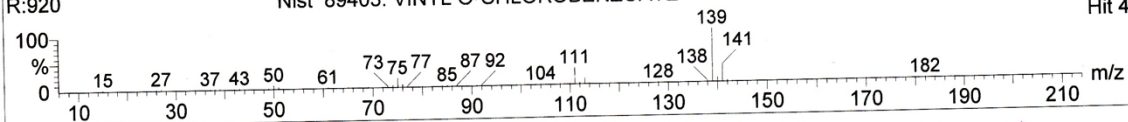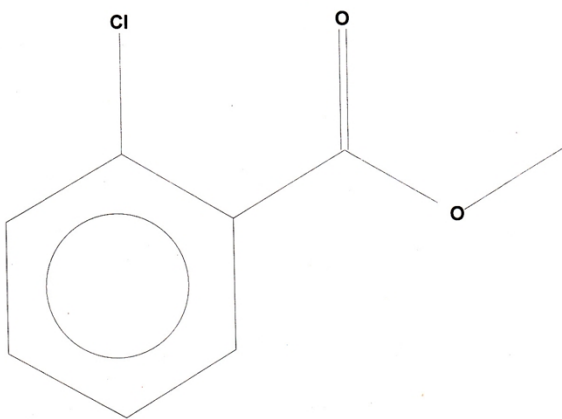

S PRATI HAR12

| Hit | REV | for | Compound Name                                                          | M.V |
|-----|-----|-----|------------------------------------------------------------------------|-----|
| 1   | 930 | 917 | BENZOIC ACID, 2-CHLORO-                                                | 156 |
| 2   | 924 | 914 | BENZOIC ACID, 3-CHLORO-                                                | 156 |
| 3   | 915 | 904 | BENZOIC ACID, 4-CHLORO-                                                | 156 |
| 4   | 901 | 857 | 3-(2-CHLORO-BENZOYL)-2-(2-DIETHYLAMINO-ETHYLSULFANYL)-6-HYDROXY-5-ISO  | 423 |
| 5   | 889 | 595 | ETHYL 2-CHLORO-2-(3-CHLOROBENZAMIDO)-3,3,3-TRIFLUOROPROPIONATE         | 343 |
| 6   | 885 | 649 | VINYL O-CHLOROBENZOATE                                                 | 182 |
| 7   | 883 | 588 | ETHYL 2-CHLORO-2-(4-CHLOROBENZAMIDO)-3,3,3-TRIFLUOROPROPIONATE         | 343 |
| 8   | 880 | 857 | ANTHRANILIC ACID, N-(3-METHOXYPHENYL)-                                 | 243 |
| 9   | 878 | 577 | 2-(4-CHLOROPHENYL)-2-OXOETHYL 2-CHLOROBENZOATE                         | 308 |
| 10  | 871 | 596 | 2,2'-DICHLOROBENZIL                                                    | 278 |
| 11  | 867 | 591 | 2-CHLOROBENZOIC ACID, 4-CYANOPHENYL ESTER                              | 257 |
| 12  | 865 | 537 | 7-[4-[1-(3-CHLOROBENZAMIDO)-1-ETHOXYCARBONYL-2,2,2-TRIFLUOROETHYL]-1-P | 638 |
| 13  | 864 | 627 | 4'-CHLORO-2-HYDROXYACETOPHENONE                                        | 170 |
| 14  | 862 | 637 | BENZOIC ACID, 2-CHLORO-, PHENYL ESTER                                  | 232 |
| 15  | 862 | 647 | 4-CHLOROBENZOIC ACID, 2-CHLOROPHENYL ESTER                             | 268 |
| 16  | 862 | 635 | 4-CHLOROBENZOIC ACID, 3,5-DIFLUOROPHENYL ESTER                         | 268 |
| 17  | 861 | 545 | 4-CHLOROBENZOIC ACID, 4-NITROPHENYL ESTER                              | 277 |
| 18  | 859 | 631 | BENZOYL CHLORIDE, 2-CHLORO-                                            | 174 |
| 19  | 857 | 617 | BENZOIC ACID, 2-CHLORO-, 2-ACETYLPHENYL ESTER                          | 274 |
| 20  | 857 | 537 | BENZOIC ACID, 2-CHLORO-, [2-CHLORO-4-(2-CHLOROBENZOYLOXY)PHENYL]-EST   | 420 |

, 02-May-2014 + 11:34:02

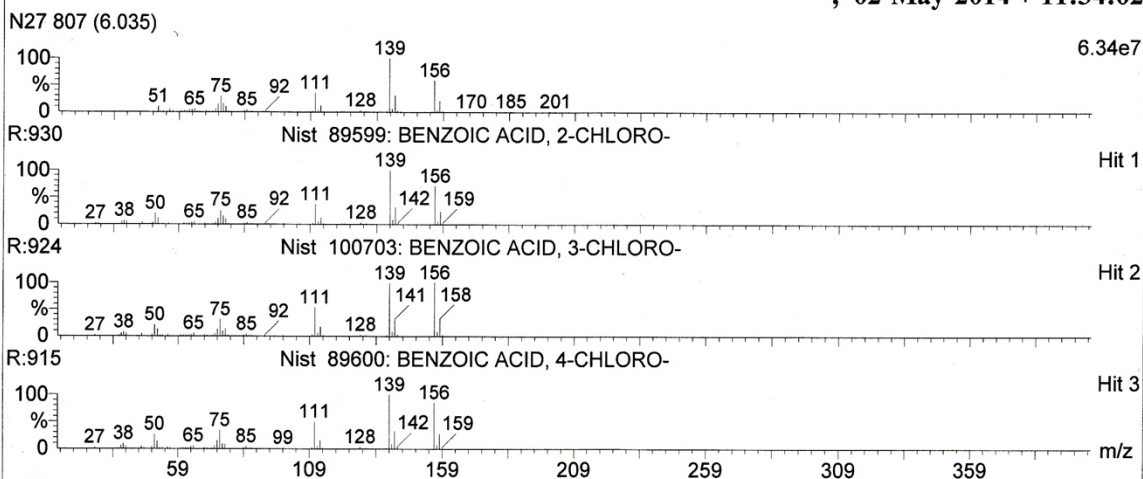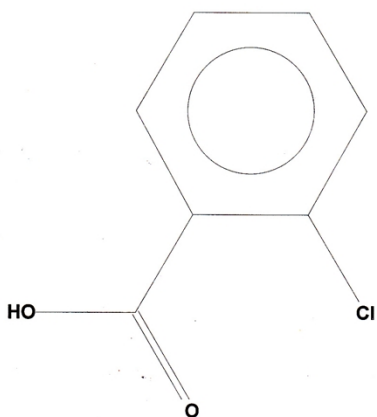

|  |
|--|
|  |
|  |
|  |
|  |
|  |
|  |
|  |

**References:**
